# Supplementary material for: Anion-enhanced excited state charge separation in a spiro-locked N-heterocycle-fused push-pull zinc porphyrin
Source: Royal Society of Chemistry journal article supplement (doi:10.1039/d1sc00038a), 2021-01-01
Supplement: d1sc00038a2.pdf [file d1sc00038a2.pdf]

Table of Contents

**Anion-enhanced Excited State Charge Separation in a Spiro-locked N-Heterocycle-fused Push-Pull Zinc Porphyrin**

Mandeep K. Chahal, Anuradha Liyanage, Ajyal Z. Alsaleh, Paul A. Karr, Jonathan P. Hill\* and Francis D'Souza\*

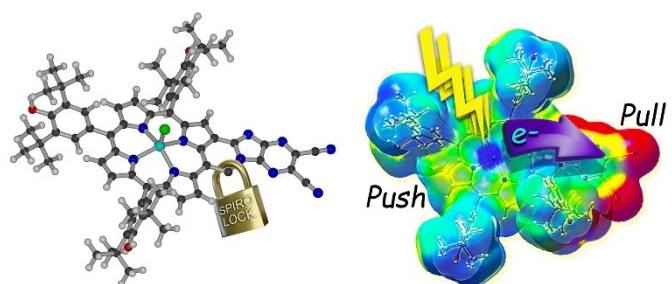

Anion-induced enhancement of excited state charge separation in a spiro-locked nitrogen-heterocycle-fused push-pull zinc porphyrin by ligation of fluoride to the Zn centre is demonstrated using advanced spectroscopic techniques.
